# Supplementary material for: Detection and Quantification of Adulteration in Krill Oil with Raman and Infrared Spectroscopic Methods
Source: MDPI journal article supplement (doi:10.3390/molecules28093695), 2023-04-25
Supplement: s1 [file s1]

Supplementary information for:

# Detection and Quantification of Adulteration in Krill Oil with Raman and Infrared Spectroscopic Methods

Fatema Ahmmed <sup>1,†</sup>, Keith C. Gordon <sup>1,\*</sup>, Daniel P. Killeen <sup>2</sup> and Sara J. Fraser-Miller <sup>1,\*</sup>

<sup>1</sup> Te Whai Ao-Dodd-Walls Centre for Photonic and Quantum Technologies, Department of Chemistry, University of Otago, P.O. Box 56, Dunedin 9016, New Zealand; fahmmed@massey.ac.nz

<sup>2</sup> The New Zealand Institute for Plant and Food Research Limited, P.O. Box 5114, Port Nelson, Nelson 7043, New Zealand; daniel.killeen@plantandfood.co.nz

\* Correspondence: keith.gordon@otago.ac.nz (K.C.G.); sara.miller@otago.ac.nz (S.J.F.-M.)

† Current address: Riddet Institute, Massey University, Private Bag 11 222, Palmerston North 4442, New Zealand.

## List of Contents

Figure S1 : An overview of all oil samples used in this experiment. Abbreviation: KO = krill oil; PO = palm oil; O3C =  $\omega$ -3 concentrates in ethyl ester; FO = fish oil..... 2

Figure S2 : Decision tree/workflow for evaluating unknown samples..... 3

Figure S3 : PLSR calibration lines and regression coefficients for quantitative prediction of FO concentration in krill oil by Raman (a,b), IR (c,d) and low-level fused Raman plus IR data (e,f)..... 4

Table S1: A summary of the studied samples with sample name, country of origin, company, batch number and best before..... 5

Table S2: Summary of the sample mixtures used in this study. Samples are expressed as weight percentages (% w/w). Abbreviations: VO = valuable oil; KO1 to KO6 = Krill oil batch; PO = palm oil; O3C =  $\omega$ -3 concentrates in ethyl ester; FO = Fish oil; M = model set; T = test set..... 6

Table S3: SVM Model performance for classification of pure (KO) and adulterants (PO, O3C and FO) using FT-Raman, FT-IR and Fused data..... 9

Table S4: SVM model performance with accuracy, sensitivity and specificity test of pure (KO) and adulterants (PO, O3C and FO) using FT-Raman, FT-IR and Fused data ..... 10

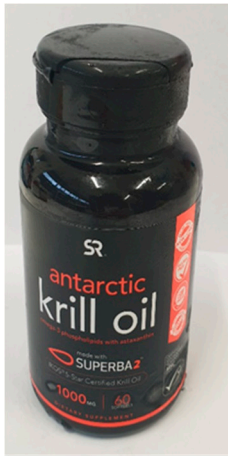

K1

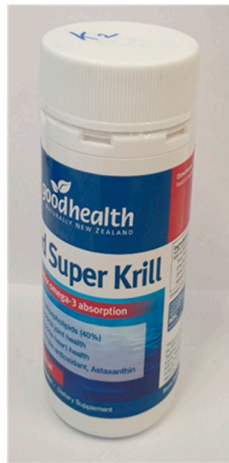

K2

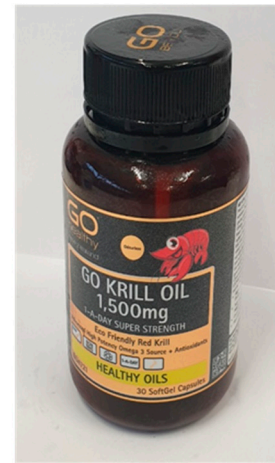

K3

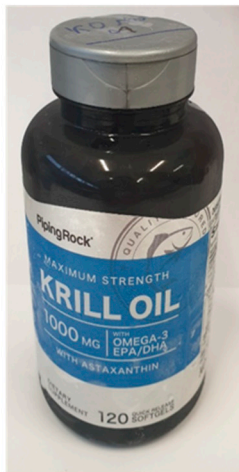

K4

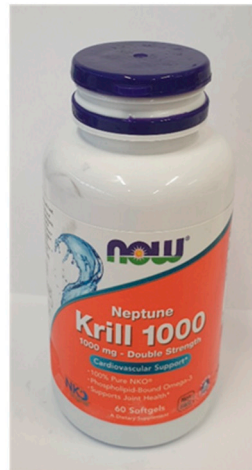

K5

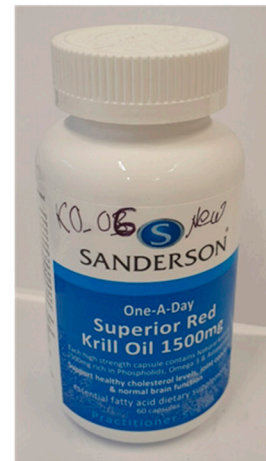

K6

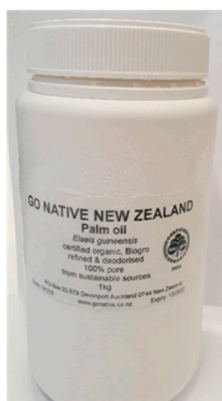

PO

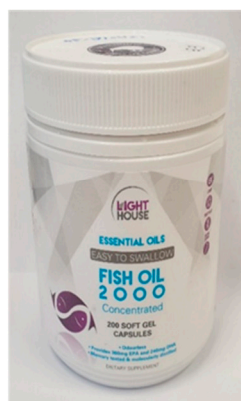

O3C

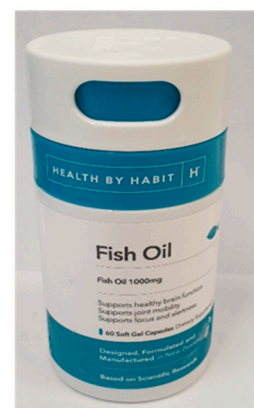

FO

Figure S1 : An overview of all oil samples used in this experiment. Abbreviation: KO = krill oil; PO = palm oil; O3C =  $\omega$ -3 concentrates in ethyl ester; FO = fish oil

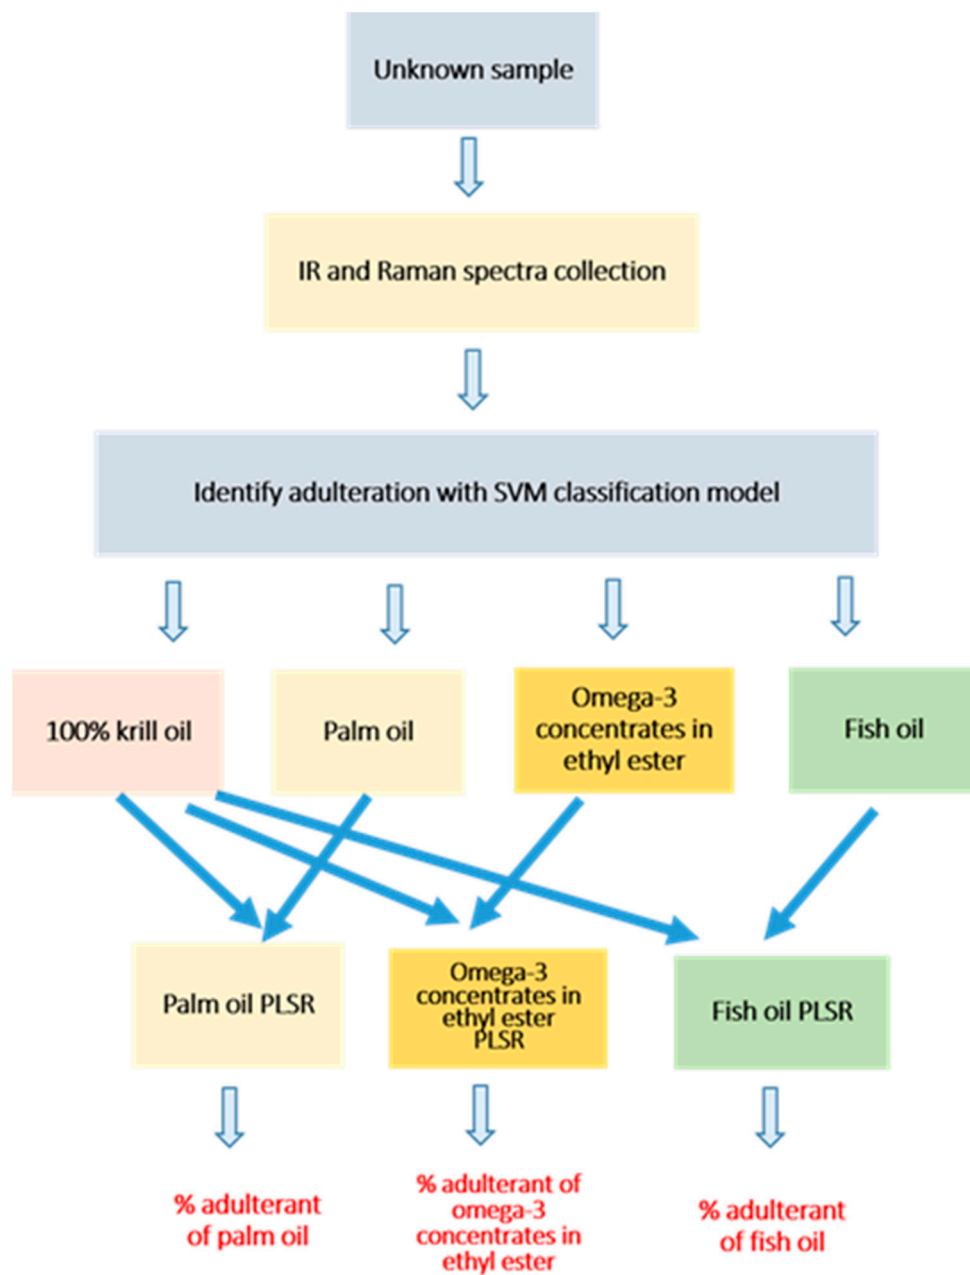

Figure S2 : Decision tree/workflow for evaluating unknown samples

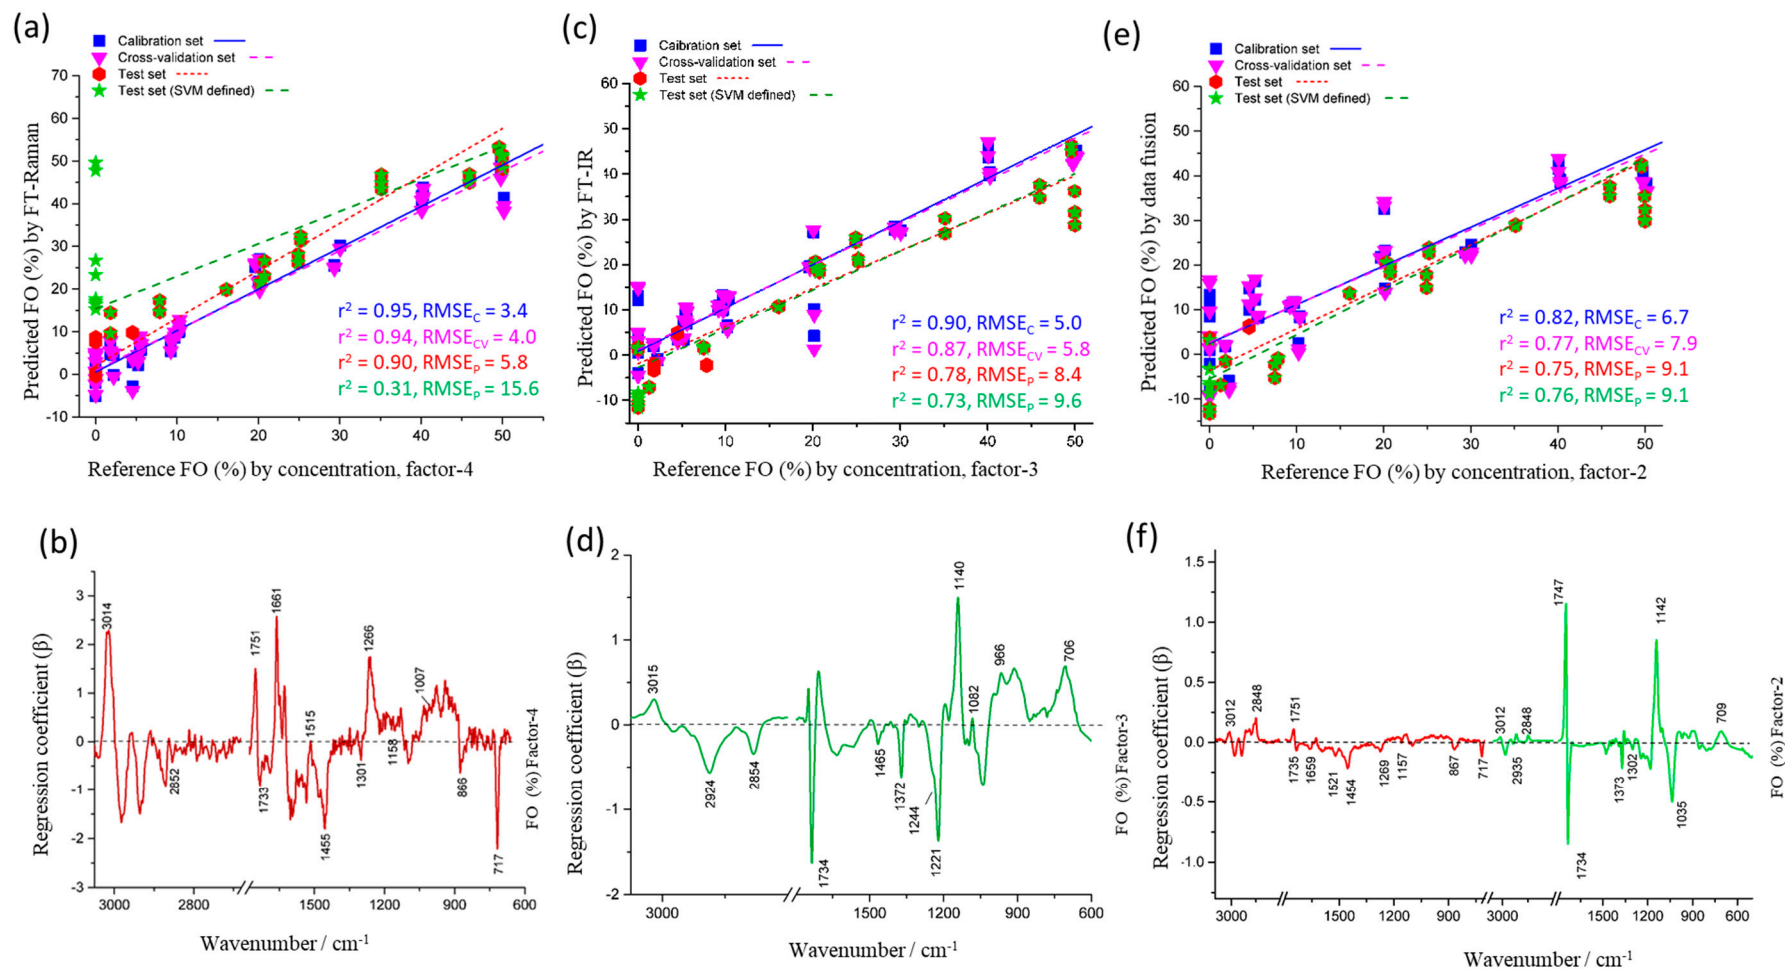

Figure S3 : PLSR calibration lines and regression coefficients for quantitative prediction of FO concentration in krill oil by Raman (a,b), IR (c,d) and low-level fused Raman plus IR data (e,f)

**Table S1: A summary of the studied samples with sample name, country of origin, company, batch number and best before**

| <b>Sample name</b>                      | <b>Country of origin</b> | <b>company</b>        | <b>batch no.</b> | <b>best before</b> |
|-----------------------------------------|--------------------------|-----------------------|------------------|--------------------|
| <b>Antarctic krill oil (KO1)</b>        | New Zealand              | SR                    | SRE-00453        | 07/2023            |
| <b>Red super krill (KO2)</b>            | New Zealand              | Good health           | P90L             | 03/2023            |
| <b>Go Krill oil (KO3)</b>               | New Zealand              | Go healthy            | JO270            | 01/2023            |
| <b>Krill oil (KO4)</b>                  | New Zealand              | PipingRock            | B980E            | 08/2023            |
| <b>Neptune krill 1000 (KO5)</b>         | USA                      | NOW                   | 1627BT           | 06/2023            |
| <b>Superior red krill oil (KO6)</b>     | New Zealand              | Sanderson             | B7629            | 5/2024             |
| <b>Fish oil 2000 concentrated (O3C)</b> | New Zealand              | Lighthouse            | T8005            | 09/2021            |
| <b>Palm oil (PO)</b>                    | New Zealand              | Go native New Zealand | 01216            | 12/2022            |
| <b>Fish oil (FO)</b>                    | New Zealand              | Health by habit       | KO875            | 07/2023            |

**Table S2: Summary of the sample mixtures used in this study. Samples are expressed as weight percentages (% w/w). Abbreviations: VO = valuable oil; KO1 to KO6 = Krill oil batch; PO = palm oil; O3C =  $\omega$ -3 concentrates in ethyl ester; FO = Fish oil; M = model set; T = test set**

| Predominant oil type | Batch | VO (% w/w) | PO (% w/w) | O3C (% w/w) | FO (% w/w) | Dataset (M or T) |
|----------------------|-------|------------|------------|-------------|------------|------------------|
| Krill oil samples    | KO1   | 100.0      | 0.0        | 0.0         | 0.0        | M                |
|                      | KO1   | 97.8       | 0.0        | 0.0         | 2.2        | M                |
|                      | KO1   | 89.8       | 0.0        | 0.0         | 10.2       | M                |
|                      | KO1   | 70.0       | 0.0        | 0.0         | 30.0       | M                |
|                      | KO1   | 50.2       | 0.0        | 0.0         | 49.8       | M                |
|                      | KO1   | 94.9       | 0.0        | 5.1         | 0.0        | M                |
|                      | KO1   | 79.6       | 0.0        | 20.4        | 0.0        | M                |
|                      | KO1   | 97.8       | 2.2        | 0.0         | 0.0        | M                |
|                      | KO1   | 89.2       | 10.8       | 0.0         | 0.0        | M                |
|                      | KO1   | 69.6       | 30.4       | 0.0         | 0.0        | M                |
|                      | KO1   | 51.6       | 48.4       | 0.0         | 0.0        | M                |
|                      | KO1   | 60.0       | 0.0        | 40.0        | 0.0        | M                |
|                      | KO1   | 79.9       | 0.0        | 20.1        | 0.0        | M                |
|                      | KO2   | 100.0      | 0.0        | 0.0         | 0.0        | M                |
|                      | KO2   | 94.5       | 0.0        | 0.0         | 5.5        | M                |
|                      | KO2   | 94.4       | 0.0        | 0.0         | 5.6        | M                |
|                      | KO2   | 90.8       | 0.0        | 0.0         | 9.2        | M                |
|                      | KO2   | 90.3       | 0.0        | 0.0         | 9.7        | M                |
|                      | KO2   | 80.4       | 0.0        | 0.0         | 19.6       | M                |
|                      | KO2   | 59.7       | 0.0        | 0.0         | 40.3       | M                |
|                      | KO2   | 97.4       | 0.0        | 2.6         | 0.0        | M                |
|                      | KO2   | 89.8       | 0.0        | 10.2        | 0.0        | M                |
|                      | KO2   | 70.6       | 0.0        | 29.4        | 0.0        | M                |
|                      | KO2   | 50.1       | 0.0        | 49.9        | 0.0        | M                |
|                      | KO2   | 50.0       | 0.0        | 50.0        | 0.0        | M                |
|                      | KO2   | 94.7       | 5.3        | 0.0         | 0.0        | M                |
|                      | KO2   | 79.6       | 20.4       | 0.0         | 0.0        | M                |
|                      | KO2   | 75.8       | 24.2       | 0.0         | 0.0        | M                |
|                      | KO2   | 75.0       | 25.0       | 0.0         | 0.0        | M                |
|                      | KO2   | 60.7       | 39.3       | 0.0         | 0.0        | M                |
|                      | KO2   | 59.9       | 40.1       | 0.0         | 0.0        | M                |
|                      | KO4   | 100.0      | 0.0        | 0.0         | 0.0        | M                |

|  |     |       |      |      |      |   |
|--|-----|-------|------|------|------|---|
|  | KO4 | 98.2  | 0.0  | 0.0  | 1.8  | M |
|  | KO4 | 89.6  | 0.0  | 0.0  | 10.4 | M |
|  | KO4 | 70.7  | 0.0  | 0.0  | 29.4 | M |
|  | KO4 | 49.8  | 0.0  | 0.0  | 50.2 | M |
|  | KO4 | 93.6  | 0.0  | 6.4  | 0.0  | M |
|  | KO4 | 80.1  | 0.0  | 19.9 | 0.0  | M |
|  | KO4 | 60.6  | 0.0  | 39.4 | 0.0  | M |
|  | KO4 | 98.0  | 2.0  | 0.0  | 0.0  | M |
|  | KO4 | 90.3  | 9.7  | 0.0  | 0.0  | M |
|  | KO4 | 70.4  | 29.6 | 0.0  | 0.0  | M |
|  | KO4 | 49.7  | 50.3 | 0.0  | 0.0  | M |
|  | KO6 | 100.0 | 0.0  | 0.0  | 0.0  | M |
|  | KO6 | 95.5  | 0.0  | 0.0  | 4.5  | M |
|  | KO6 | 79.9  | 0.0  | 0.0  | 20.1 | M |
|  | KO6 | 59.9  | 0.0  | 0.0  | 40.1 | M |
|  | KO6 | 98.0  | 0.0  | 2.0  | 0.0  | M |
|  | KO6 | 89.9  | 0.0  | 10.1 | 0.0  | M |
|  | KO6 | 70.9  | 0.0  | 29.1 | 0.0  | M |
|  | KO6 | 50.3  | 0.0  | 49.7 | 0.0  | M |
|  | KO6 | 94.4  | 5.6  | 0.0  | 0.0  | M |
|  | KO6 | 79.9  | 20.1 | 0.0  | 0.0  | M |
|  | KO6 | 60.1  | 39.9 | 0.0  | 0.0  | M |
|  | KO6 | 80.2  | 19.8 | 0.0  | 0.0  | M |
|  | KO6 | 79.8  | 0.0  | 0.0  | 20.2 | M |
|  | KO6 | 90.3  | 0.0  | 9.7  | 0.0  | M |
|  | KO6 | 94.7  | 5.3  | 0.0  | 0.0  | M |
|  | KO6 | 94.8  | 0.0  | 0.0  | 5.2  | M |
|  | KO6 | 99.1  | 0.0  | 0.9  | 0.0  | M |
|  | KO3 | 100.0 | 0.0  | 0.0  | 0.0  | T |
|  | KO3 | 95.5  | 0.0  | 0.0  | 4.5  | T |
|  | KO3 | 83.9  | 0.0  | 0.0  | 16.1 | T |
|  | KO3 | 79.7  | 0.0  | 0.0  | 20.3 | T |
|  | KO3 | 79.2  | 0.0  | 0.0  | 20.8 | T |
|  | KO3 | 74.8  | 0.0  | 0.0  | 25.2 | T |
|  | KO3 | 54.1  | 0.0  | 0.0  | 45.9 | T |
|  | KO3 | 50.0  | 0.0  | 0.0  | 50.0 | T |
|  | KO3 | 95.6  | 0.0  | 4.4  | 0.0  | T |
|  | KO3 | 90.8  | 0.0  | 9.2  | 0.0  | T |
|  | KO3 | 74.5  | 0.0  | 25.5 | 0.0  | T |
|  | KO3 | 70.1  | 0.0  | 29.9 | 0.0  | T |
|  | KO3 | 69.8  | 0.0  | 30.2 | 0.0  | T |

|  |     |       |      |      |      |   |
|--|-----|-------|------|------|------|---|
|  | KO3 | 64.7  | 0.0  | 35.3 | 0.0  | T |
|  | KO3 | 50.2  | 0.0  | 49.8 | 0.0  | T |
|  | KO3 | 84.5  | 15.5 | 0.0  | 0.0  | T |
|  | KO3 | 74.9  | 25.1 | 0.0  | 0.0  | T |
|  | KO3 | 54.1  | 45.9 | 0.0  | 0.0  | T |
|  | KO3 | 49.5  | 50.5 | 0.0  | 0.0  | T |
|  | KO3 | 50.0  | 0.0  | 0.0  | 50.0 | T |
|  | KO5 | 100.0 | 0.0  | 0.0  | 0.0  | T |
|  | KO5 | 98.2  | 0.0  | 0.0  | 1.8  | T |
|  | KO5 | 92.1  | 0.0  | 0.0  | 7.9  | T |
|  | KO5 | 75.1  | 0.0  | 0.0  | 24.9 | T |
|  | KO5 | 64.9  | 0.0  | 0.0  | 35.1 | T |
|  | KO5 | 50.4  | 0.0  | 0.0  | 49.6 | T |
|  | KO5 | 98.3  | 0.0  | 1.7  | 0.0  | T |
|  | KO5 | 85.0  | 0.0  | 15.0 | 0.0  | T |
|  | KO5 | 75.6  | 0.0  | 24.4 | 0.0  | T |
|  | KO5 | 55.3  | 0.0  | 44.7 | 0.0  | T |
|  | KO5 | 49.7  | 0.0  | 50.3 | 0.0  | T |
|  | KO5 | 98.5  | 1.5  | 0.0  | 0.0  | T |
|  | KO5 | 92.4  | 7.6  | 0.0  | 0.0  | T |
|  | KO5 | 75.2  | 24.9 | 0.0  | 0.0  | T |
|  | KO5 | 65.3  | 34.7 | 0.0  | 0.0  | T |
|  | KO5 | 49.8  | 50.2 | 0.0  | 0.0  | T |
|  | KO5 | 92.5  | 0.0  | 0.0  | 7.5  | T |
|  | KO5 | 98.8  | 0.0  | 0.0  | 1.2  | T |



Table S3: SVM Model performance for classification of pure (KO) and adulterants (PO, O3C and FO) using FT-Raman, FT-IR and Fused data

|                  |        | FT-Raman   | Test set (76% accuracy) |     |    |  |
|------------------|--------|------------|-------------------------|-----|----|--|
| Confusion matrix | Actual | 1          | 2                       | 3   | 4  |  |
| Predicted        |        | KO         | PO                      | O3C | FO |  |
| 1                | KO     | 0          | 0                       | 0   | 2  |  |
| 2                | PO     | 4          | 18                      | 0   | 4  |  |
| 3                | O3C    | 0          | 0                       | 17  | 0  |  |
| 4                | FO     | 0          | 0                       | 7   | 19 |  |
|                  |        | FT-IR      | Test set (79% accuracy) |     |    |  |
| Confusion matrix | Actual | 1          | 2                       | 3   | 4  |  |
| Predicted        |        | KO         | PO                      | O3C | FO |  |
| 1                | KO     | 2          | 4                       | 2   | 4  |  |
| 2                | PO     | 2          | 13                      | 0   | 2  |  |
| 3                | O3C    | 0          | 0                       | 22  | 1  |  |
| 4                | FO     | 0          | 0                       | 0   | 18 |  |
|                  |        | Fused data | Test set (84% accuracy) |     |    |  |
| Confusion matrix | Actual | 1          | 2                       | 3   | 4  |  |
| Predicted        |        | KO         | PO                      | O3C | FO |  |
| 1                | KO     | 4          | 2                       | 3   | 4  |  |
| 2                | PO     | 0          | 16                      | 0   | 1  |  |
| 3                | O3C    | 0          | 0                       | 20  | 0  |  |
| 4                | FO     | 0          | 0                       | 1   | 19 |  |

Table S4: SVM model performance with accuracy, sensitivity and specificity test of pure (KO) and adulterants (PO, O3C and FO) using FT-Raman, FT-IR and Fused data

| Technique  | Training set              |                                   | Test set |                                       |     |                                       |    |     |    |     |     |
|------------|---------------------------|-----------------------------------|----------|---------------------------------------|-----|---------------------------------------|----|-----|----|-----|-----|
|            | Accuracy<br>(calibration) | Accuracy<br>(cross<br>validation) | Accuracy | Sensitivity to individual classes (%) |     | Specificity to individual classes (%) |    | O3C | FO |     |     |
|            |                           |                                   |          | KO                                    | PO  | KO                                    | PO |     |    |     |     |
| FT-Raman   | 100                       | 86                                | 76       | 0                                     | 100 | 71                                    | 76 | 97  | 85 | 100 | 85  |
| FT-IR      | 100                       | 96                                | 79       | 50                                    | 76  | 92                                    | 72 | 85  | 92 | 98  | 100 |
| Fused data | 100                       | 92                                | 84       | 100                                   | 89  | 83                                    | 79 | 86  | 98 | 100 | 98  |
